# Supplementary material for: Integrated multimodal artificial intelligence framework for healthcare applications
Source: Springer Nature journal article supplement (doi:10.1038/s41746-022-00689-4), 2022-09-20
Supplement: 41746_2022_689_MOESM1_ESM.pdf [file 41746_2022_689_MOESM1_ESM.pdf]

## SUPPLEMENTAL MATERIAL

### 5 **Integrated multimodal artificial intelligence framework for healthcare applications**

Luis R. Soenksen<sup>1,4\*</sup>, Yu Ma<sup>2\*</sup>, Cynthia Zeng<sup>2\*</sup>, Leonard D.J. Boussioux<sup>2\*</sup>, Kimberly M Villalobos<sup>2\*</sup>, Liangyuan Na<sup>2\*</sup>, Holly Mika Wiberg<sup>2</sup>, Michael L. Li<sup>2</sup>, Ignacio Fuentes<sup>1</sup>, Dimitris Bertsimas<sup>1,2,3 ‡</sup>

10

<sup>1</sup>Abdul Latif Jameel Clinic for Machine Learning in Health, MIT, Cambridge, MA 02139, USA.

<sup>2</sup>Operations Research Center, Massachusetts Institute of Technology (MIT), Cambridge, MA 02139, USA. <sup>3</sup>Sloan School of Management, MIT, Cambridge, MA 02139, USA. <sup>4</sup>Wyss

Institute for Biologically Inspired Engineering, Harvard University, Boston, MA 02115, USA.

15

\* These authors contributed equally to this work

‡ Corresponding author. Email: [dbertsim@mit.edu](mailto:dbertsim@mit.edu)

20

25

30

35

40

45

50

55

## Supplemental Tables

60

65

| #  | Chart events                                | Laboratory events | Procedure events    |
|----|---------------------------------------------|-------------------|---------------------|
| 1  | Heart rate                                  | Glucose           | Foley Catheter      |
| 2  | Non-invasive systolic blood pressure        | Potassium         | PICC Line           |
| 3  | Non-invasive blood diastolic pressure       | Sodium            | Intubation          |
| 4  | Non-invasive nominal blood pressure         | Chloride          | Peritoneal dialysis |
| 5  | Respiratory rate                            | Creatinine        | Bronchoscopy        |
| 6  | O <sub>2</sub> saturation by pulse oximetry | Urea nitrogen     | EEG                 |
| 7  | Verbal GCS response                         | Bicarbonate       | Dialysis CRRT       |
| 8  | Eye opening GCS response                    | Anion gap         | Dialysis catheter   |
| 9  | Motor GCS response                          | Hemoglobin        | Chest tube removed  |
| 10 |                                             | Hematocrit        | Hemodialysis        |
| 11 |                                             | Magnesium         |                     |
| 12 |                                             | Platelet count    |                     |
| 13 |                                             | Phosphate         |                     |
| 14 |                                             | White Blood Cells |                     |
| 15 |                                             | Total calcium     |                     |
| 16 |                                             | MCH               |                     |
| 17 |                                             | Red Blood Cells   |                     |
| 18 |                                             | MCHC              |                     |
| 19 |                                             | MCV               |                     |
| 20 |                                             | RDW               |                     |
| 21 |                                             | Platelet count    |                     |
| 22 |                                             | Neutrophils       |                     |
| 23 |                                             | Vancomycin        |                     |

**Supplemental Table 1. Patient signals in HAIM-MIMIC-MM by type of event used as time-series for embedding extraction.** Nine time-dependent signals were derived from procedures, twenty-three were derived from laboratories, and eight were derived from information included in the patient chart. CRRT=Continuous renal replacement therapy, EEG=Electroencephalogram, GCS=Glasgow Coma Scale, MCH=Mean corpuscular hemoglobin, MCHC=Mean corpuscular hemoglobin concentration, PICC=Peripherally inserted central catheter, RDW=Red blood cell distribution width.

70

75

80

85

90

95

| # | Data Modalities | #  | Data Sources                                         | Extracted Features |
|---|-----------------|----|------------------------------------------------------|--------------------|
| 1 | Tabular         | 1  | Demographics ( $E_{de}$ )                            | 6                  |
| 2 | Time-series     | 2  | Chart events ( $E_{ce}$ )                            | 99                 |
|   |                 | 3  | Laboratory events ( $E_{le}$ )                       | 242                |
|   |                 | 4  | Procedure events ( $E_{pe}$ )                        | 110                |
|   |                 | 5  | Radiological notes ( $E_{radn}$ )                    | 768                |
| 3 | Text            | 6  | Electrocardiogram notes ( $E_{ecgn}$ )               | 768                |
|   |                 | 7  | Echocardiogram notes ( $E_{econ}$ )                  | 768                |
|   |                 | 8  | Visual probabilities ( $E_{vp}$ )                    | 18                 |
| 4 | Images          | 9  | Visual dense-layer feature ( $E_{vd}$ )              | 18                 |
|   |                 | 10 | Aggregated visual probabilities ( $E_{vmp}$ )        | 1024               |
|   |                 | 11 | Aggregated visual dense-layer features ( $E_{vmd}$ ) | 1024               |

**Supplemental Table 2. List of different data modalities and data sources used to test the HAIM framework based on the HAIM-MIMIC-MM database.** There are a total of four data modalities and eleven data sources. All data sources correspond to only one data modality. Thus, a model trained on a single data modality can have as little as 1 data source and many as 4 different data sources (of the same kind) as inputs. Double, triple and quadruple modality models can have a number of data sources ranging from [2 to 7], [3 to 9] and [4 to 11], respectively. The number of features (per data source) extracted by the pre-trained feature extractors selected for our demonstration of the HAIM pipeline based on HAIM-MIMIC-MM are also shown.

110

115

| <b>Feature Name</b>                   | <b>Missing %</b> | <b>Source</b> | <b>Handling</b> |
|---------------------------------------|------------------|---------------|-----------------|
| anchor_age                            | 0.0              | Demographics  | N/A             |
| gender_int                            | 0.0              | Demographics  | N/A             |
| ethnicity_int                         | 0.0              | Demographics  | N/A             |
| marital_status_int                    | 0.0              | Demographics  | N/A             |
| language_int                          | 0.0              | Demographics  | N/A             |
| insurance_int                         | 0.0              | Demographics  | N/A             |
| Foley Catheter                        | 82.6             | Procedure     | Fill with 0     |
| PICC Line                             | 63.7             | Procedure     | Fill with 0     |
| Intubation                            | 75.3             | Procedure     | Fill with 0     |
| Peritoneal Dialysis                   | 99.7             | Procedure     | Fill with 0     |
| Bronchoscopy                          | 81.5             | Procedure     | Fill with 0     |
| EEG                                   | 91.5             | Procedure     | Fill with 0     |
| Dialysis – CRRT                       | 93.1             | Procedure     | Fill with 0     |
| Dialysis Catheter                     | 88.9             | Procedure     | Fill with 0     |
| Chest Tube Removed                    | 93.1             | Procedure     | Fill with 0     |
| Hemodialysis                          | 92.9             | Procedure     | Fill with 0     |
| Glucose                               | 4.4              | Lab           | Fill with 0     |
| Potassium                             | 4.7              | Lab           | Fill with 0     |
| Sodium                                | 4.7              | Lab           | Fill with 0     |
| Chloride                              | 4.7              | Lab           | Fill with 0     |
| Creatinine                            | 4.7              | Lab           | Fill with 0     |
| Urea Nitrogen                         | 4.7              | Lab           | Fill with 0     |
| Bicarbonate                           | 4.7              | Lab           | Fill with 0     |
| Anion Gap                             | 4.7              | Lab           | Fill with 0     |
| Hemoglobin                            | 4.7              | Lab           | Fill with 0     |
| Hematocrit                            | 4.8              | Lab           | Fill with 0     |
| Magnesium                             | 5.4              | Lab           | Fill with 0     |
| Platelet Count                        | 9.8              | Lab           | Fill with 0     |
| Phosphate                             | 6.0              | Lab           | Fill with 0     |
| White Blood Cells                     | 4.9              | Lab           | Fill with 0     |
| Calcium, Total                        | 6.0              | Lab           | Fill with 0     |
| MCH                                   | 4.9              | Lab           | Fill with 0     |
| Red Blood Cells                       | 4.9              | Lab           | Fill with 0     |
| MCHC                                  | 4.9              | Lab           | Fill with 0     |
| MCV                                   | 4.9              | Lab           | Fill with 0     |
| RDW                                   | 4.9              | Lab           | Fill with 0     |
| Neutrophils                           | 36.9             | Lab           | Fill with 0     |
| Vancomycin                            | 60.0             | Lab           | Fill with 0     |
| Heart Rate                            | 19.5             | Chart         | Fill with 0     |
| Non-Invasive Blood Pressure systolic  | 23.4             | Chart         | Fill with 0     |
| Non-Invasive Blood Pressure diastolic | 23.4             | Chart         | Fill with 0     |
| Non-Invasive Blood Pressure mean      | 23.3             | Chart         | Fill with 0     |
| Respiratory Rate                      | 19.5             | Chart         | Fill with 0     |
| O2 saturation pulse oximetry          | 19.6             | Chart         | Fill with 0     |
| GCS - Verbal Response                 | 20.8             | Chart         | Fill with 0     |

|                         |      |       |              |
|-------------------------|------|-------|--------------|
| GCS - Eye Opening       | 20.7 | Chart | Fill with 0  |
| GCS - Motor Response    | 20.8 | Chart | Fill with 0  |
| Electrocardiogram Notes | 11.2 | Notes | Empty String |
| Echocardiogram Notes    | 30.5 | Notes | Empty String |
| Radiology Notes         | 0.1  | Notes | Empty String |

120 **Supplemental Table 3. List of missing data percentages by individual variables and**  
**handling strategy.** Individual variables (i.e., feature name) within key HAIM-MIMIC-MM data  
source groups are shown. The strategy for missing value handling used in our tests is as follows:  
1) We exclude patients with no available X-rays from our selection cohort; 2) Time-series  
features are imputed with 0 if there is no measurement at any timestamp; 3) Text  
embeddings are generated on from an empty string if there is no note available; 4) There  
125 were no missing values for demographics data.

130

135

140

145

150

155

160

## Supplemental Figures

**Supplemental Fig. 1. Compilation of performance metrics across sample trained models on HAIM-MIMIC-MM** A) Values of area under the receiver operating characteristic (AUROC) curves and B) Standard deviations, for all models trained for the pathology diagnosis tasks (i.e., lung lesions, fractures, atelectasis, lung opacities, pneumothorax, enlarged cardio mediastinum, cardiomegaly, pneumonia, consolidation, and edema), ordered by individual combinations of the used 10 input sources (total=1,023 models). C) Values of AUROC curves and D) Standard deviations for length-of-stay and 48-hour mortality prediction tasks), ordered by individual combinations of the used 11 inputs sources (total=2,047 models). Additional input source in length-of-stay and 48-hour mortality prediction tasks corresponds to radiology notes, which were not used in the pathology diagnosis tasks to prevent overfitting or misrepresentation of predictive capacity of trained models.

175

180

185

190

195

200

205

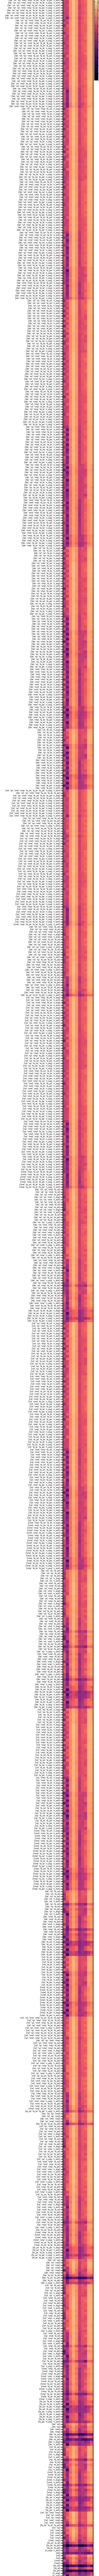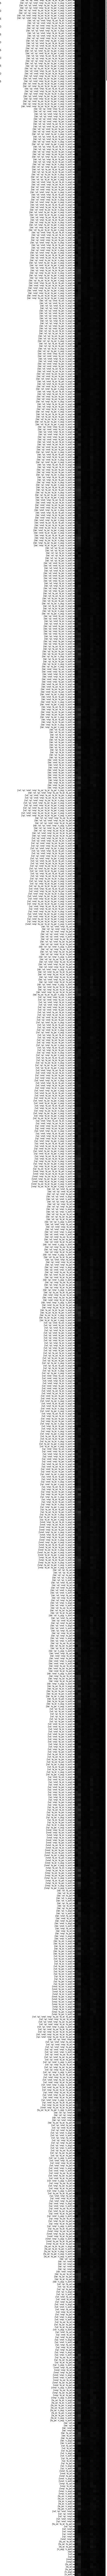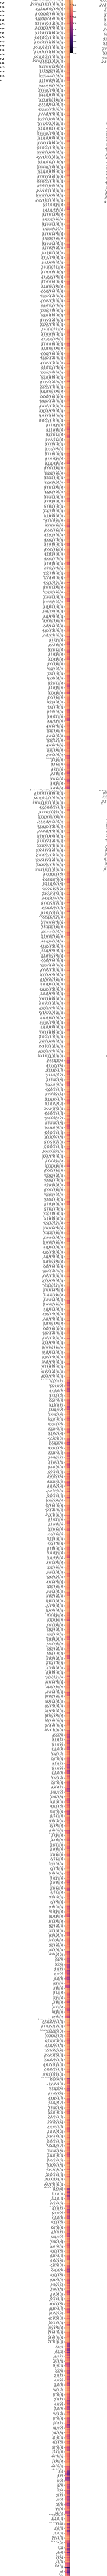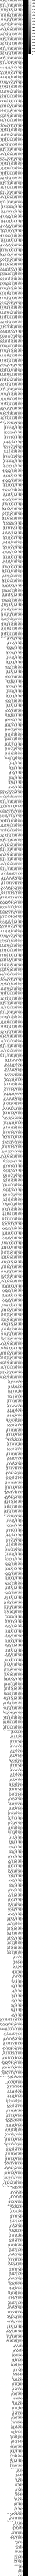

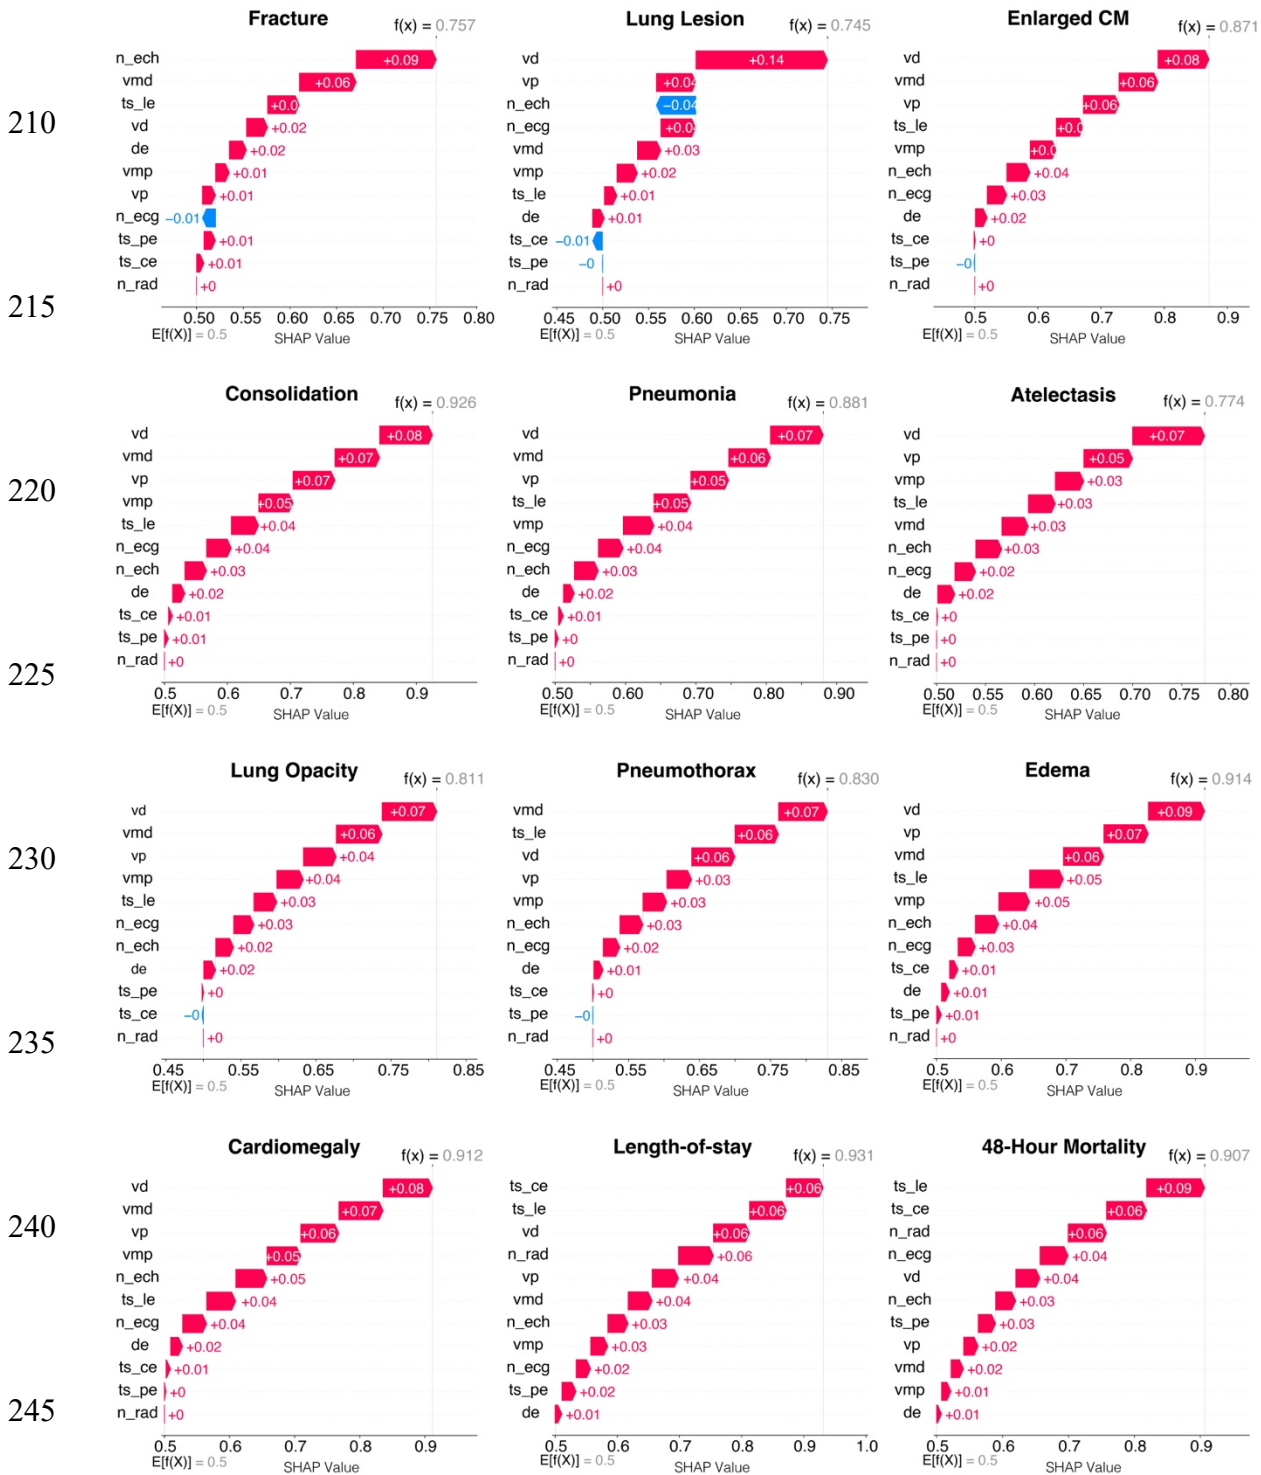

**Supplemental Fig. 2. Waterfall plots of aggregated Shapley values for independent data sources per predictive task.** Shapley values for different tasks exhibit distinct distributions of aggregated Shapley values across input data sources, with mostly positively contributing effects towards predictive capacity (red values pointing right), with the exception of a small number of Shapley values with marginal negative values (blue values pointing left).



---

**Algorithm 1** Holistic Artificial Intelligence in Medicine (HAIM) Experiments Pipeline

---

255

**Input:** $\mathcal{I}$ : Set of data modalities $\mathcal{K}$ : Set of prediction tasks $\mathcal{P}$ : Set of hyperparameter combinations $\mathcal{M}$ : Set of evaluation metrics

260

 $\mathbf{X}^i, f_i$ : Feature data and feature extractor for data modality  $i$  $\mathbf{y}_k$ : Target vector for task  $k$  $g_p$ : Predictive model with parameter  $p$  $L_k$ : Loss function for task  $k$  $s$ : Number of random seeds to reproduce experiments $c$ : Number of cross-validation folds

265

Remarks:  $|\cdot|$  denotes the cardinality of a set and  $[n]$  denotes the set  $\{1, 2, \dots, n\}$  for any positive integer  $n \in \mathbb{N}$ .**Output:** $\mathbf{E}$ : One-dimensional HAIM embedding

270

 $g_k^* \forall k \in \mathcal{K}$ : Trained HAIM models with highest observed performance on prediction tasks  $k \in \mathcal{K}$ Performance results: Performance metrics for  $\mathcal{M}$  per trained HAIM model**for**  $i \in \mathcal{I}$  **do**

275

 $\mathbf{e}^i \leftarrow f_i(\mathbf{X}^i)$   $\triangleright$  Generate embeddings of source  $i$  using SOTA model  $f_i$  $\mathbf{e}_v^i \leftarrow \text{vec}(\mathbf{e}^i)$   $\triangleright$  Flatten vector  $\mathbf{e}^i$  to be one-dimensional $\mathbf{e}_n^i \leftarrow \frac{\mathbf{e}_v^i - \min(\mathbf{e}_v^i)}{\max(\mathbf{e}_v^i) - \min(\mathbf{e}_v^i)}$   $\triangleright$  Normalize vector  $\mathbf{e}_v^i$  by min-max scaling**end for** $\mathbf{E} \leftarrow [\mathbf{e}_n^1, \mathbf{e}_n^1, \dots, \mathbf{e}_n^{|\mathcal{I}|}]$ .  $\triangleright$  Concatenate all flattened and normalized feature embeddings  $\mathbf{e}_n^i$  into a single one-dimensional HAIM embedding  $\mathbf{E}$ 

280

**for**  $k \in \mathcal{K}$  **do****for**  $t \in [s]$  **do** $\mathbf{E}_{train}^t, \mathbf{E}_{test}^t, \mathbf{y}_{k,train}^t, \mathbf{y}_{k,test}^t \leftarrow \text{train\_test\_split}(\mathbf{E}, \mathbf{y}_k, \text{seed} = t)$  $g_k^* \leftarrow \text{argmin}_{g_p \forall p \in \mathcal{P}} L(g_p(\mathbf{E}_{train}^t), \mathbf{y}_{k,train}^t)$   $\triangleright$   $c$ -Fold cross-validation

285

with a grid-search to select best  $p^* \in \mathcal{P}$  on the training data**end for**Performance results  $\leftarrow m(g_k^*(\mathbf{E}_{test}^t), \mathbf{y}_{k,test}^t) \quad \forall t \in [s], \forall m \in \mathcal{M}$  $\triangleright$  Evaluate trained HAIM models on test data per seed  $s$  $\triangleright$  Report average performance of evaluated HAIM models across  $s$  seeds**end for**

---

290

**Supplemental Fig. 3. Algorithmic formulation of the HAIM framework.** Heterogeneous input data (i.e., tabular, time-series, text, and images) are processed by externally validated state-of-the-art pre-trained models, specific to each data modality, used as feature extractors. The extracted features are represented as vector embeddings  $\mathbf{e}^i$  that can be easily concatenated into a single normalized vector of fixed dimensionality (HAIM Embedding). Finally, we use this HAIM embedding ( $\mathbf{E}$ ) as input to train a downstream model for each prediction task of interest ( $g_k^*$ ). SOTA= state-of-the-art.

300

305

**a**

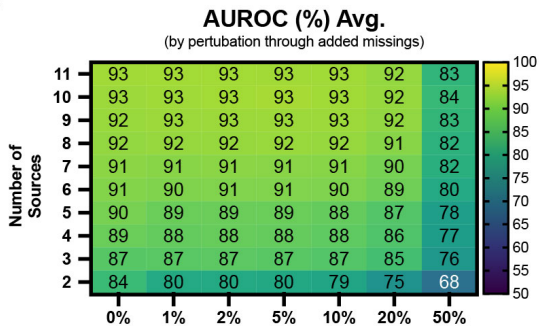

310

**b**

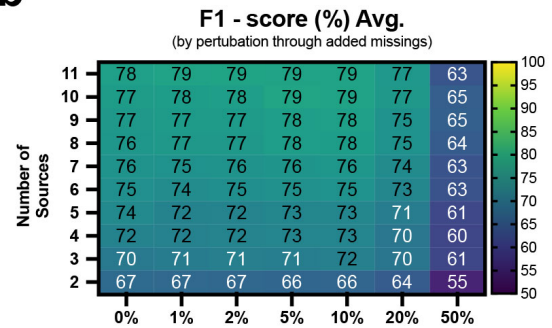

315

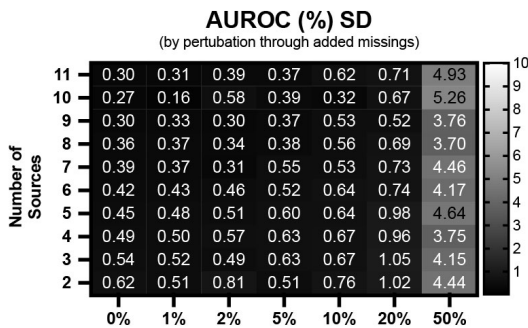

320

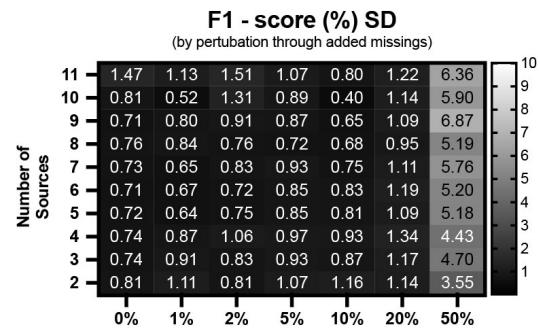

325

**Supplemental Fig. 4. Measured performance on length-of-stay predictions from using versions of HAIM-MIMIC-MM where the demographics data had been synthetically degraded to show the effects of increasing percentages of missing data in this input. To**

330

achieve this, we randomly selected 1%, 2%, 5%, 10%, 20%, and 50% of all demographic's features in patient records and substituted them with zeros to emulate different scenarios of missing data. These altered datasets were then used to extract HAIM embeddings and generate downstream predictive models based on our framework. The average and standard deviation of the AUROC curves (A), as well as F1-score (B), were evaluated over the testing set (20%) for five consecutive iterations of randomized train-test data splitting and model training. The range of sources for this test is 2 to 11, as models were trained using demographics data (i.e., tabular) with added missing percentages along with at least one more data source from other modalities (i.e., time-series, text, or images). These results show decreasing sensitivity to missing values as more data sources and modalities are added. Generally robust performance of the models was observed in the presence of missing percentages equal to or below 20% for the tabular data modality. A more noticeable reduction in the performance of trained models was measured in the presence of over 50% missing data in the tabular modality of the patient records. AUROC=area under the receiver operating characteristic; Avg=Average; SD=Standard Deviation.

335

340

observed in the presence of missing percentages equal to or below 20% for the tabular data modality. A more noticeable reduction in the performance of trained models was measured in the presence of over 50% missing data in the tabular modality of the patient records. AUROC=area under the receiver operating characteristic; Avg=Average; SD=Standard Deviation.
